# Supplementary material for: Relationship between Escherichia coli virulence factors, notably kpsMTII, and symptoms of clinical metritis and endometritis in dairy cows
Source: PubMed Central journal article supplement — J Vet Med Sci. 2022 Jan 27;84(3):420–8. doi: 10.1292/jvms.21-0586 (PMC8983293; doi:10.1292/jvms.21-0586), 2022-01-27
Supplement: jvms-84-420-s001.pdf [file jvms-84-420-s001.pdf]

**Supplementary Table 1. Primers used in polymerase chain reaction protocols.**

| Target genes   | Primer name | Primer sequence (5' to 3') | Annealing temperature | Amplicon size (bp) | Reference |
|----------------|-------------|----------------------------|-----------------------|--------------------|-----------|
| <i>cdgR</i>    | EC_F        | CCAGGCAAAGAGTTTATGTTGA     | 57                    | 212                | 28        |
|                | EC_R        | GCTATTTCTGCGGATAAGAGA      |                       |                    |           |
| <i>fimH</i>    | fimH-F      | TGCAGAACGGATAAGCCGTGG      | 63                    | 508                | 17        |
|                | fimH-R      | GCAGTCACCTGCCCTCCGGTA      |                       |                    |           |
| <i>fyuA</i>    | fyuA-F      | TGATTAACCCCGCGACGGGAA      | 63                    | 880                | 17        |
|                | fyuA-R      | CGCAGTAGGCACGATGTTGTA      |                       |                    |           |
| <i>kpsMTII</i> | kpsMTII-F   | GCGCATTTGCTGATACTGTTG      | 63                    | 272                | 17        |
|                | kpsMTII-R   | CATCCAGACGATAAGCATGAGCA    |                       |                    |           |
| <i>csgA</i>    | csgA-F      | ACTCTGACTTGACTATTACC       | 55                    | 200                | 17        |
|                | csgA-R      | AGATGCAGTCTGGTCAAC         |                       |                    |           |
| <i>hra1</i>    | hra1-F      | TCACTTGCAGACCAGCGTTTC      | 58                    | 537                | 24        |
|                | hra1-R      | GTA ACTCACACTGCTGTCACCT    |                       |                    |           |
| <i>astA</i>    | astA-F      | TGCCATCAACACAGTATATCCG     | 58                    | 102                | 2         |
|                | astA-R      | ACGGCTTTGTAGTCCTTCCAT      |                       |                    |           |

**Supplementary Table 2. Clinical symptoms associated with *Escherichia coli* isolated from the postpartum uterus.**

| Cow No. | Bacterial No. | days after parturition | Vaginal discharge score | PMN (%) | total score | Bacterial colony counts |
|---------|---------------|------------------------|-------------------------|---------|-------------|-------------------------|
| s2      | s2-1          | 14                     | 0                       | 6.5     | 4           | 20<                     |
|         | s2-2          | 14                     | 0                       | 6.5     | 4           | 2                       |
| s5      | s5-1          | 38                     | 0                       | 1.4     | 2           | 1                       |
| s6      | s6-1          | 32                     | 0                       | 6.8     | 3           | 2                       |
| s7      | s7-1          | 6                      | 3                       | 74.3    | 7           | ∞                       |
|         | s7-2          | 13                     | 3                       | 83.9    | 7           | 30<                     |
|         | s7-3          | 13                     | 3                       | 83.9    | 7           | ∞                       |
|         | s7-4          | 21                     | 0                       | 53.8    | 2           | ∞                       |
|         | s7-6          | 28                     | 0                       | 79.4    | 1           | ∞                       |
|         | s7-7          | 45                     | 3                       | 41.5    | 5           | ∞                       |
|         | s7-8          | 48                     | 3                       | 49.2    | 5           | ∞                       |
|         | s9            | s9-1                   | 9                       | 6       | 83.7        | 10                      |
| s9-2    |               | 9                      | 6                       | 83.7    | 10          | <10                     |
| s9-3    |               | 9                      | 6                       | 83.7    | 10          | 1                       |
| s9-4    |               | 9                      | 6                       | 83.7    | 10          | ∞                       |
| s9-5    |               | 15                     | 3                       | 56.9    | 5           | ∞                       |
| s11     | s11-1         | 33                     | 1                       | 6.0     | 2           | 5                       |
| s12     | s12-1         | 8                      | 3                       | 39.6    | 7           | 7                       |
|         | s12-2         | 8                      | 3                       | 39.6    | 7           | ∞                       |
|         | s12-4         | 15                     | 3                       | 13.1    | 7           | ∞                       |
|         | s12-5         | 22                     | 1                       | 16.8    | 3           | ∞                       |
|         | s12-6         | 29                     | 2                       | 41.8    | 3           | ∞                       |
|         | s12-7         | 29                     | 2                       | 41.8    | 3           | ∞                       |
| s13     | s13-1         | 16                     | 3                       | (-)     | 2           | 1                       |
|         | s13-2         | 16                     | 3                       | (-)     | 2           | ∞                       |
|         | s13-3         | 22                     | 2                       | 26.2    | 5           | 20                      |
|         | s13-4         | 43                     | 0                       | 4.9     | 0           | ∞                       |
| s14     | s14-1         | 34                     | 1                       | 7.4     | 1           | 20                      |
|         | s14-2         | 48                     | 0                       | 0.5     | 0           | 5                       |
| s15     | s15-1         | 31                     | 2                       | 0.0     | 2           | 3                       |
|         | s15-2         | 45                     | 0                       | 9.1     | 0           | 3                       |
|         | s15-3         | 66                     | 0                       | 0.4     | 0           | ∞                       |
| s16     | s16-1         | 20                     | 2                       | 71.3    | 5           | 20                      |
| s17     | s17-1         | 29                     | 1                       | 10.3    | 5           | ∞                       |
| s18     | s18-1         | 50                     | 0                       | 0.01    | 1           | ∞                       |
| s21     | s21-1         | 30                     | 0                       | 1.8     | 2           | 1                       |
|         | s21-2         | 30                     | 0                       | 1.8     | 2           | 1                       |
| s23     | s23-1         | 33                     | 0                       | 0.74    | 1           | 3                       |
| s24     | s24-1         | 43                     | 0                       | 4.8     | 2           | 6                       |
| s25     | s25-1         | 38                     | 0                       | 35.2    | 4           | 1                       |
| s27     | s27-1         | 34                     | 0                       | 10.8    | 1           | 2                       |
|         | s27-2         | 34                     | 0                       | 10.8    | 1           | 1                       |
|         | s27-3         | 34                     | 0                       | 10.8    | 1           | 1                       |
|         | s27-4         | 48                     | 3                       | 2.8     | 3           | 5                       |
| s30     | s30-1         | 29                     | 0                       | 1.6     | 2           | 3                       |

PMN%; the percentage of polymorphonuclear neutrophils

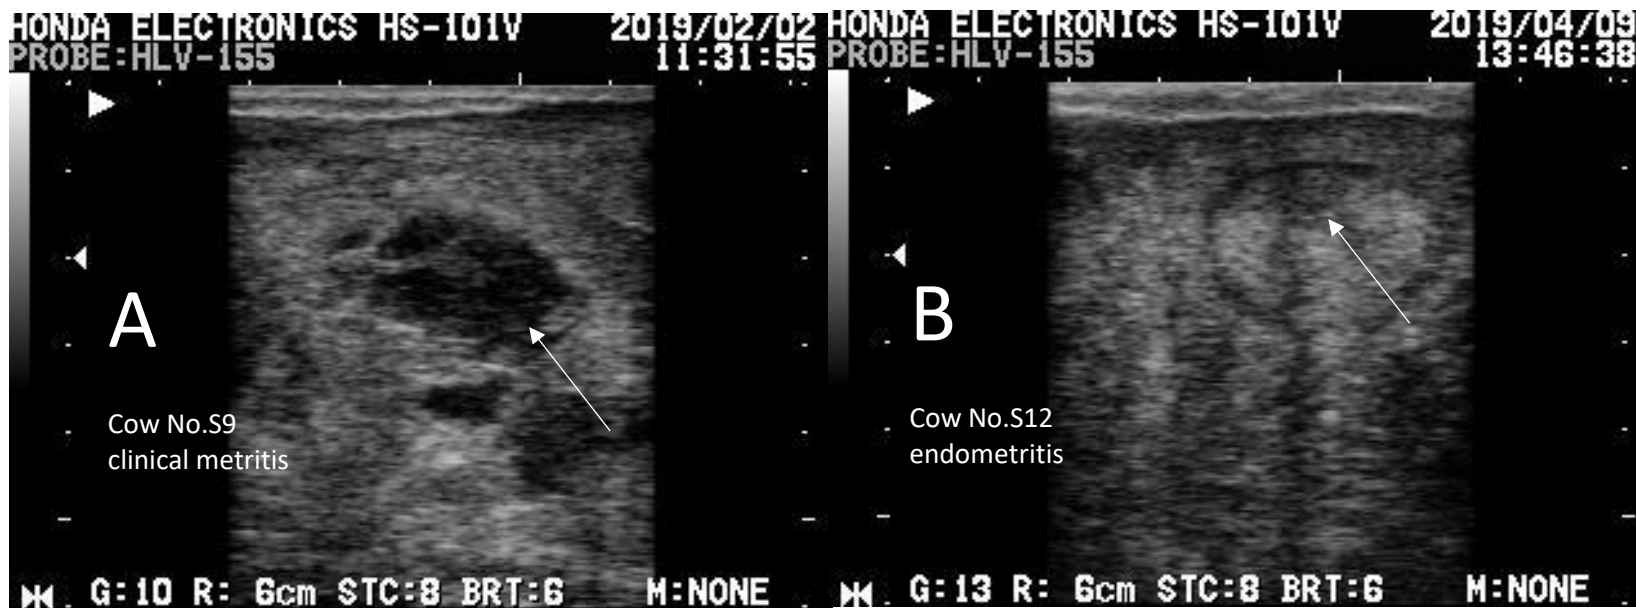

Supplementary Figure 1. The typical ultrasonographic images of the bovine uterus with clinical metritis (A) and endometritis (B).

The uterine involution of each cow was evaluated not only by transrectal palpation and vaginoscopy but also by ultrasonography. Clinical metritis (A) and endometritis (B) ultrasonograms at 9 (cow No. 9) and 29 (cow No. 12) days respectively after parturition were shown. Ultrasonographic image of the clinical metritis (A) shows grayish liquid containing hyperechogenic particles and pus (pointed by arrow symbol) in the lumen of abnormally enlarged uterine horn, but the cow was not ill. A slight hyperechogenic line (pointed by arrow symbol) showing accumulated fluid as fibrins, pus, and mucus was observed in the lumen of the cross section of the uterine horn with endometritis (B). The cow also had vaginal mucopurulent material, but was not ill.

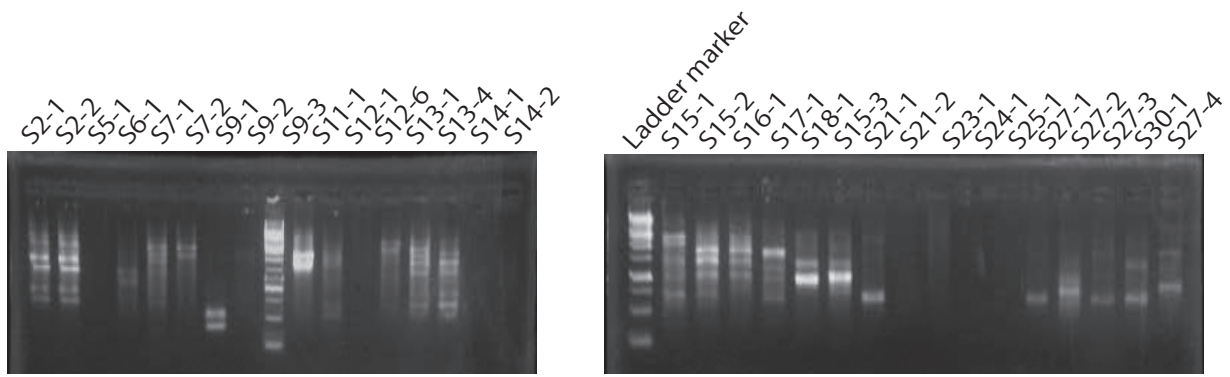

Supplementary Fig. 2
